# Supplementary material
Source: PubMed Central journal article supplement (PMC3256598)

# Supplementary Figure S1

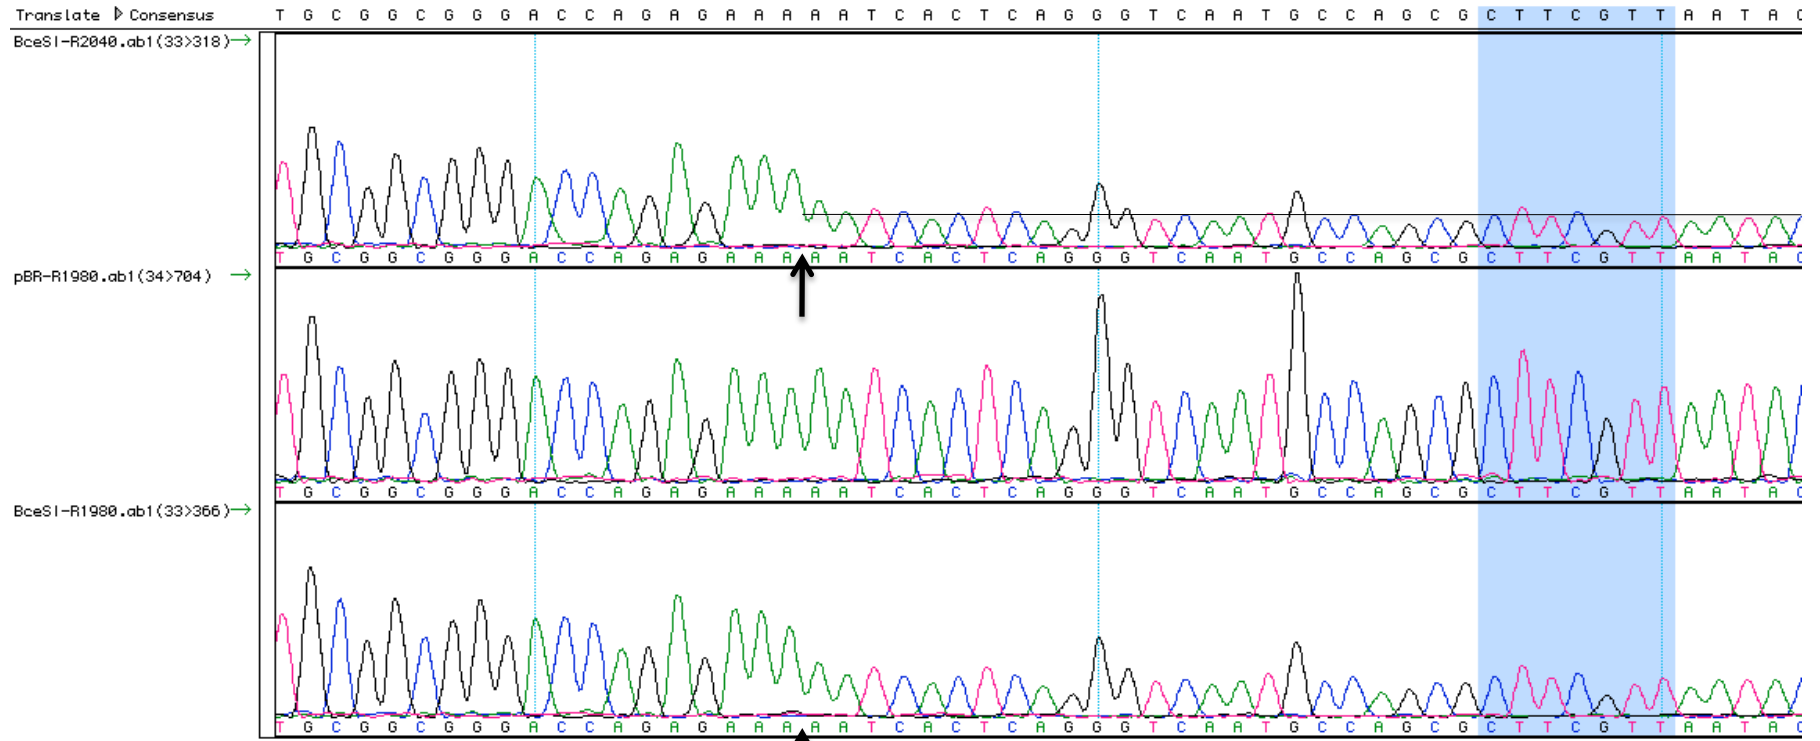

N24 (top strand)

5' AACGAAGCGCTGGCATTGACCCTGAGTGATT ↓ TTTCTCTGGTCCCGCCGCA 3' (template)

3' ttgcttcgcgaccgtaactgggactcactaa **AAAGAGACCAGGGCGGCGT** 5' ←

Seq primer

# Supplementary Figure S2

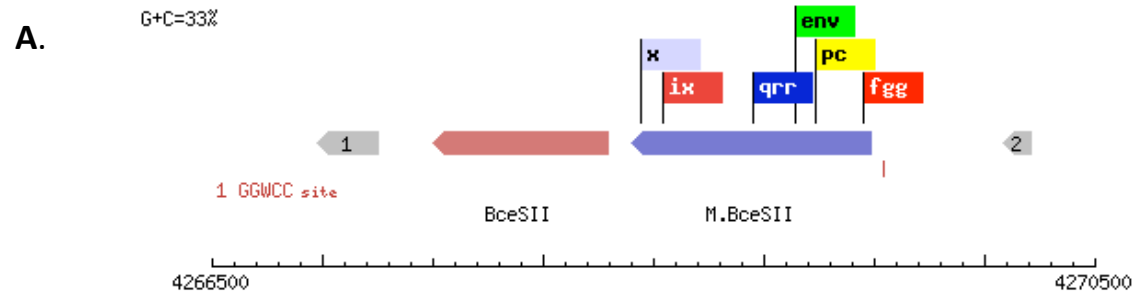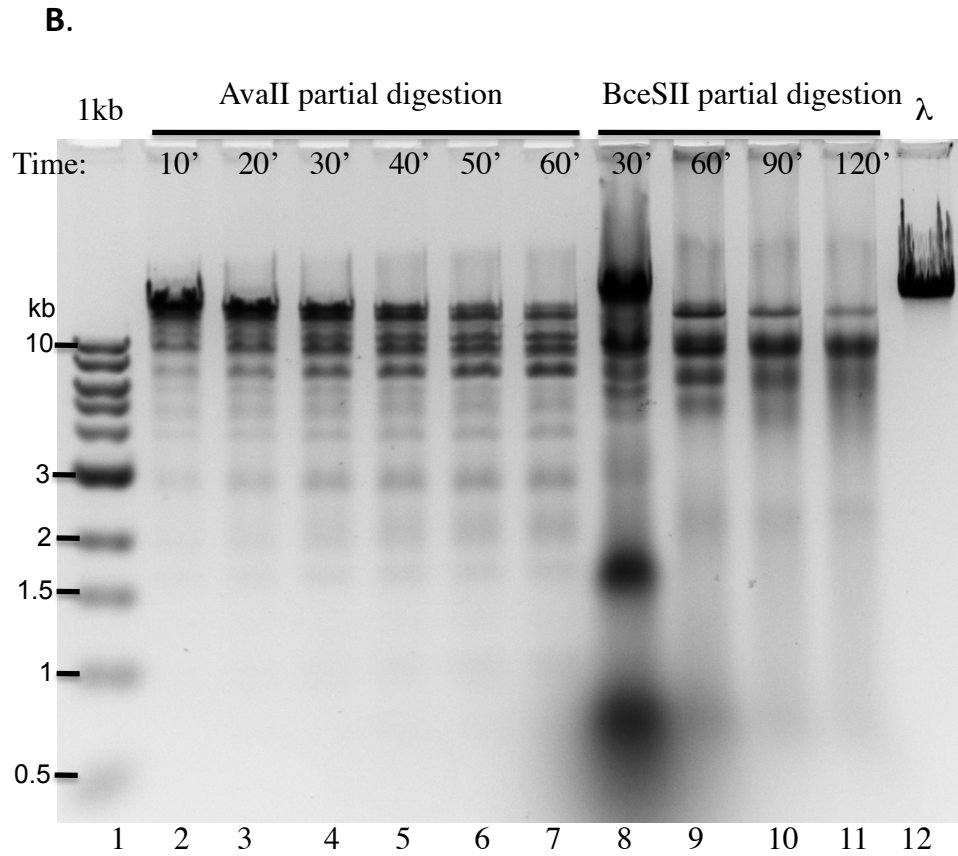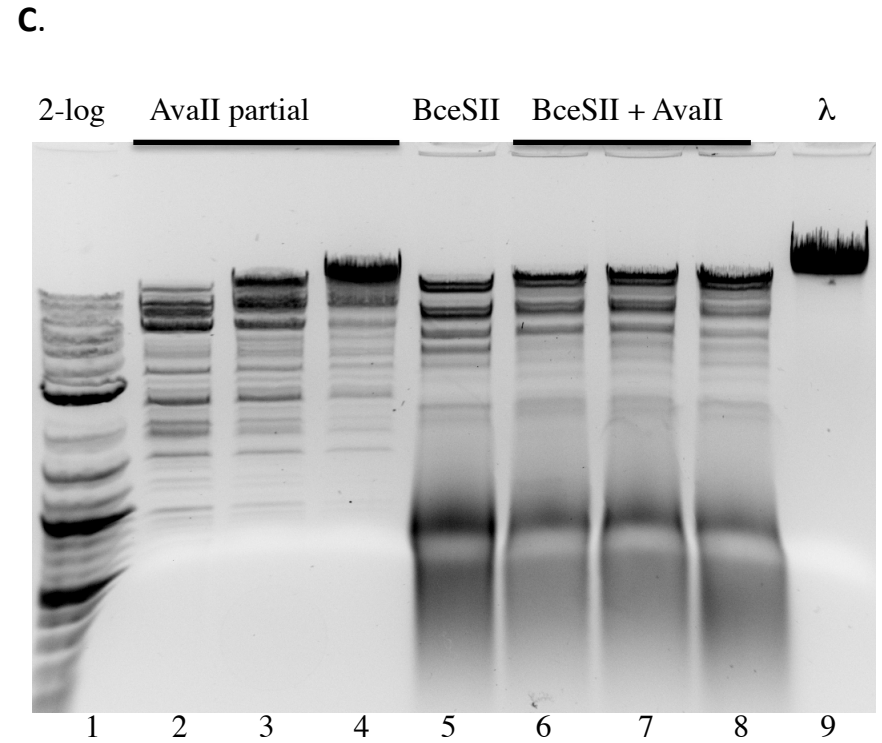

Supplementary Figure S3

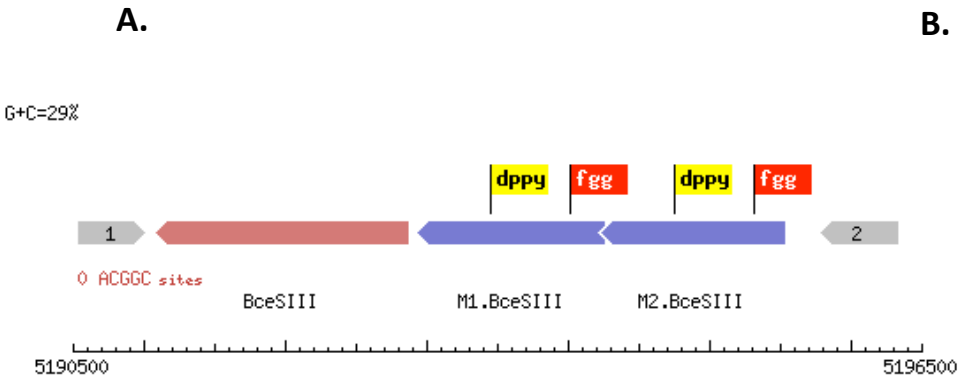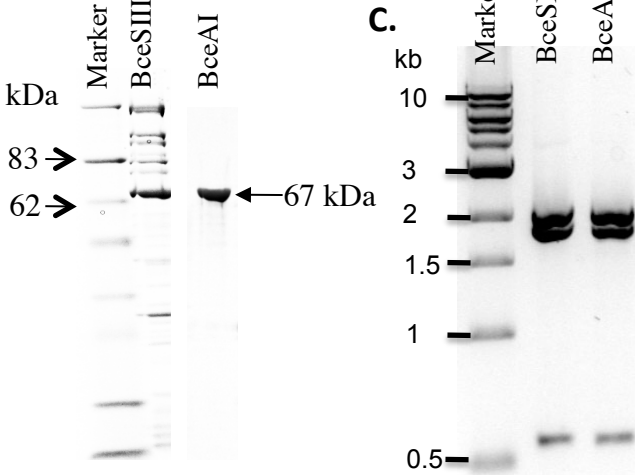

Supplementary  
Figure S4

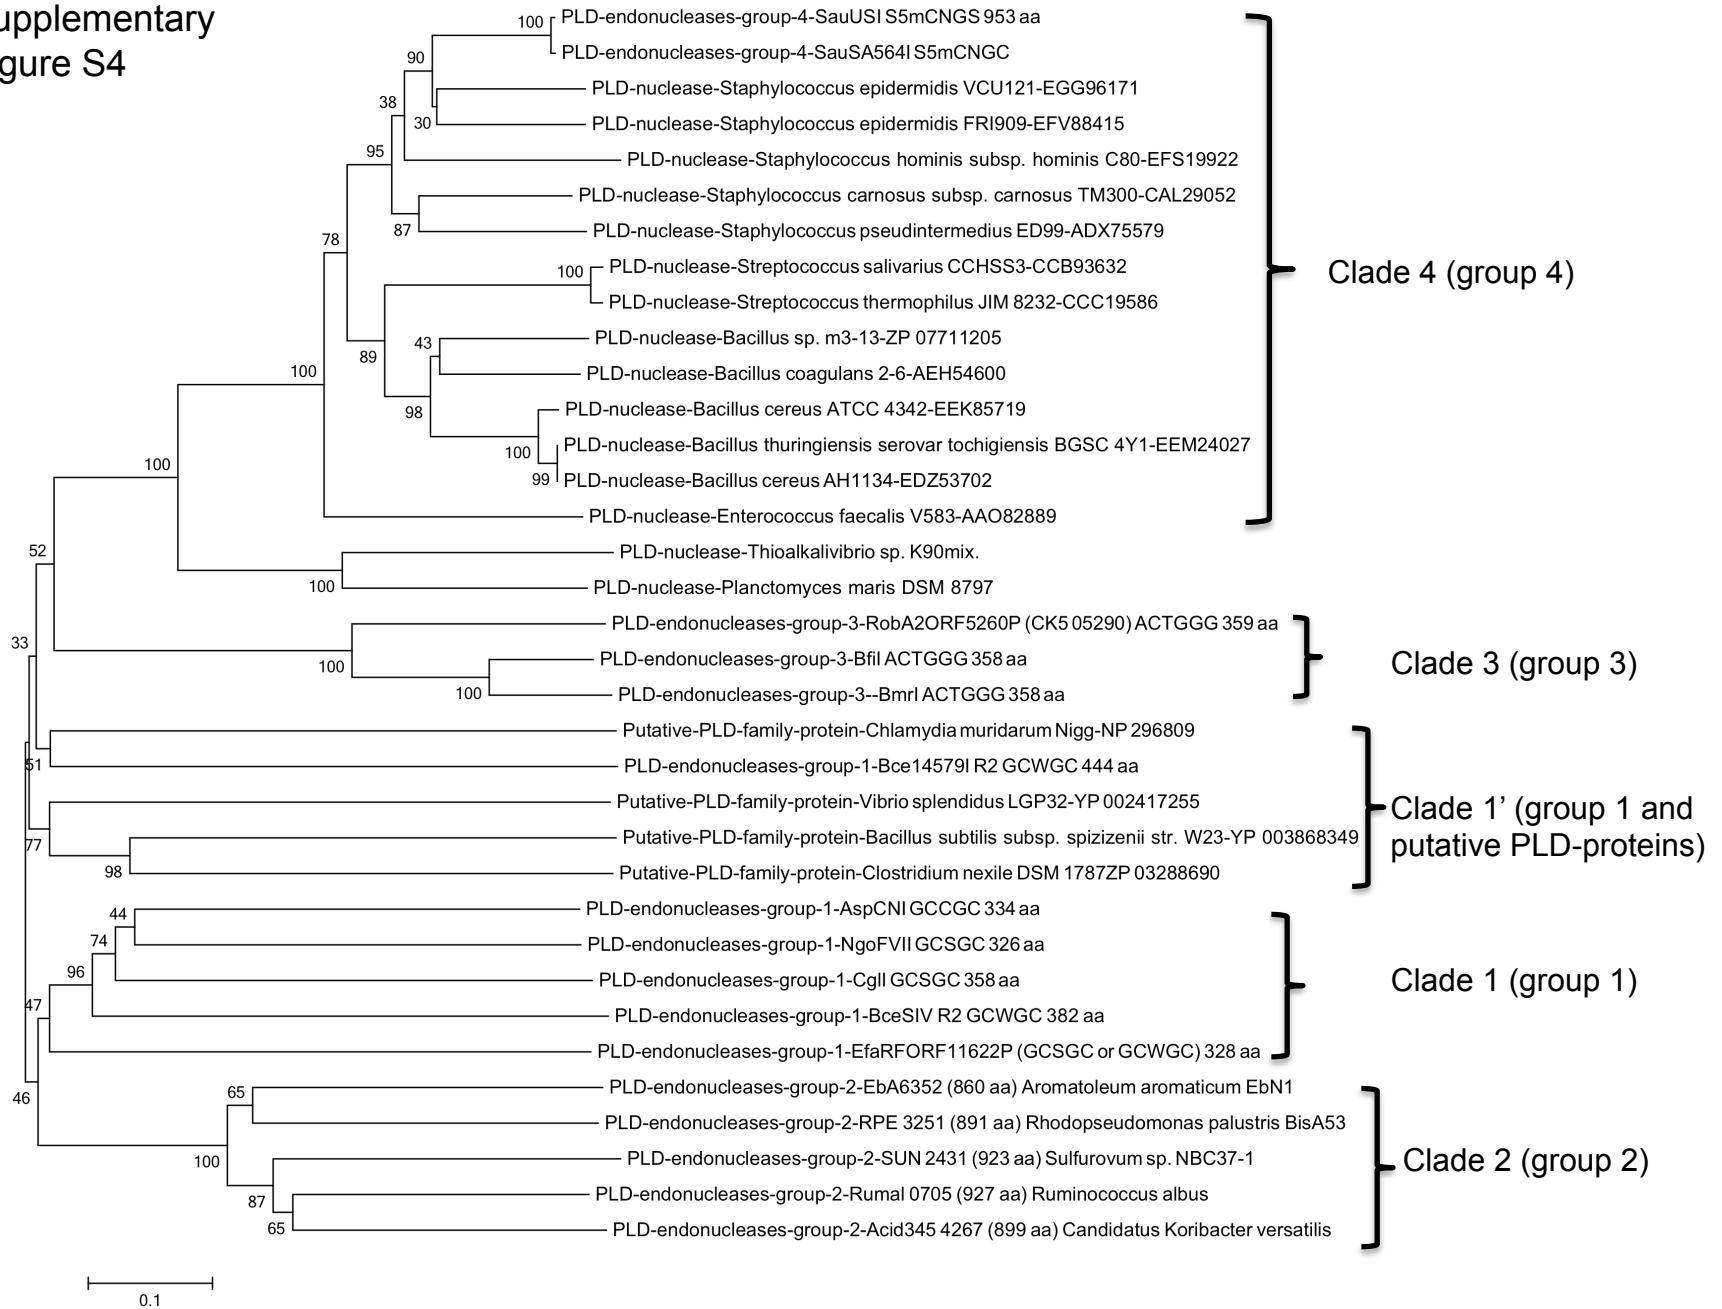

Supplementary Figure S5

A.

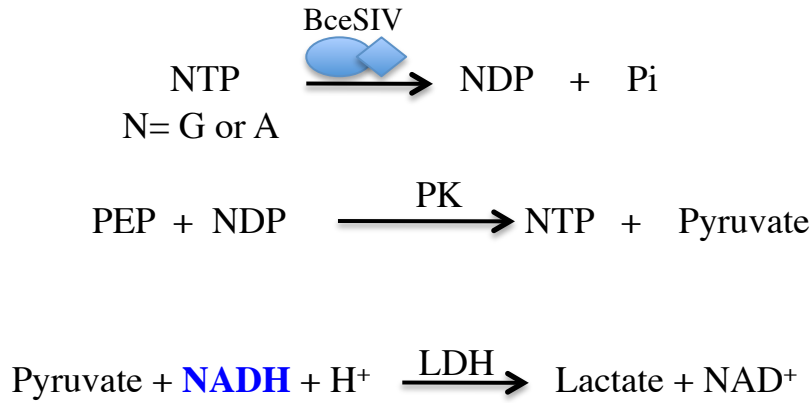

C.

**Sample**  
 10 µg enzyme  
 8 µg enzyme  
 4 µg enzyme  
 2 µg enzyme  
 1 µg enzyme  
 0.5 µg enzyme

**V<sub>a</sub>** (apparent velocity)

| ATP   | GTP   |
|-------|-------|
| 425.5 | 244.3 |
| 426.1 | 269.4 |
| 295.6 | 219.1 |
| 221.1 | 129.9 |
| 108.4 | 74.7  |
| 61.2  | 45.6  |

Blank 0  
 0 µg enzyme 0  
 reactions contain 0.5 µg lambda DNA

B.

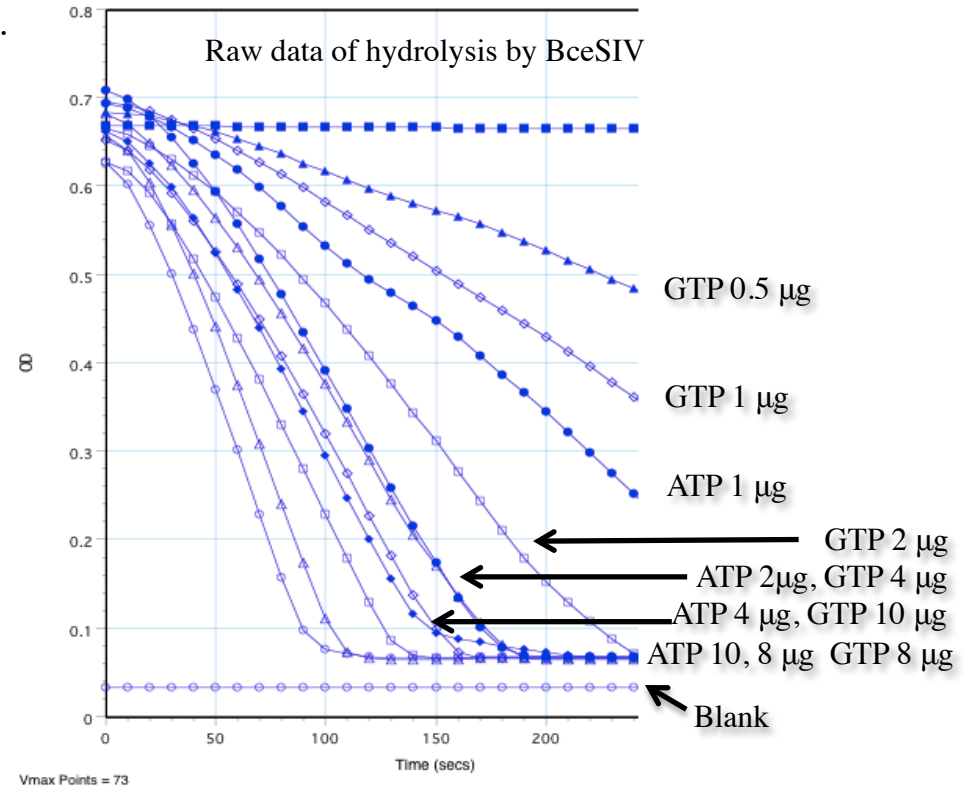

D.

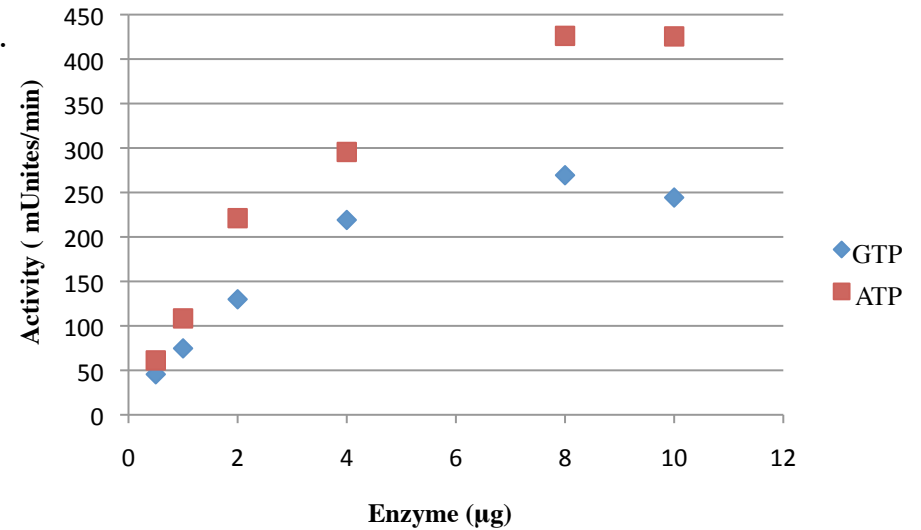

# Supplementary Figure S6

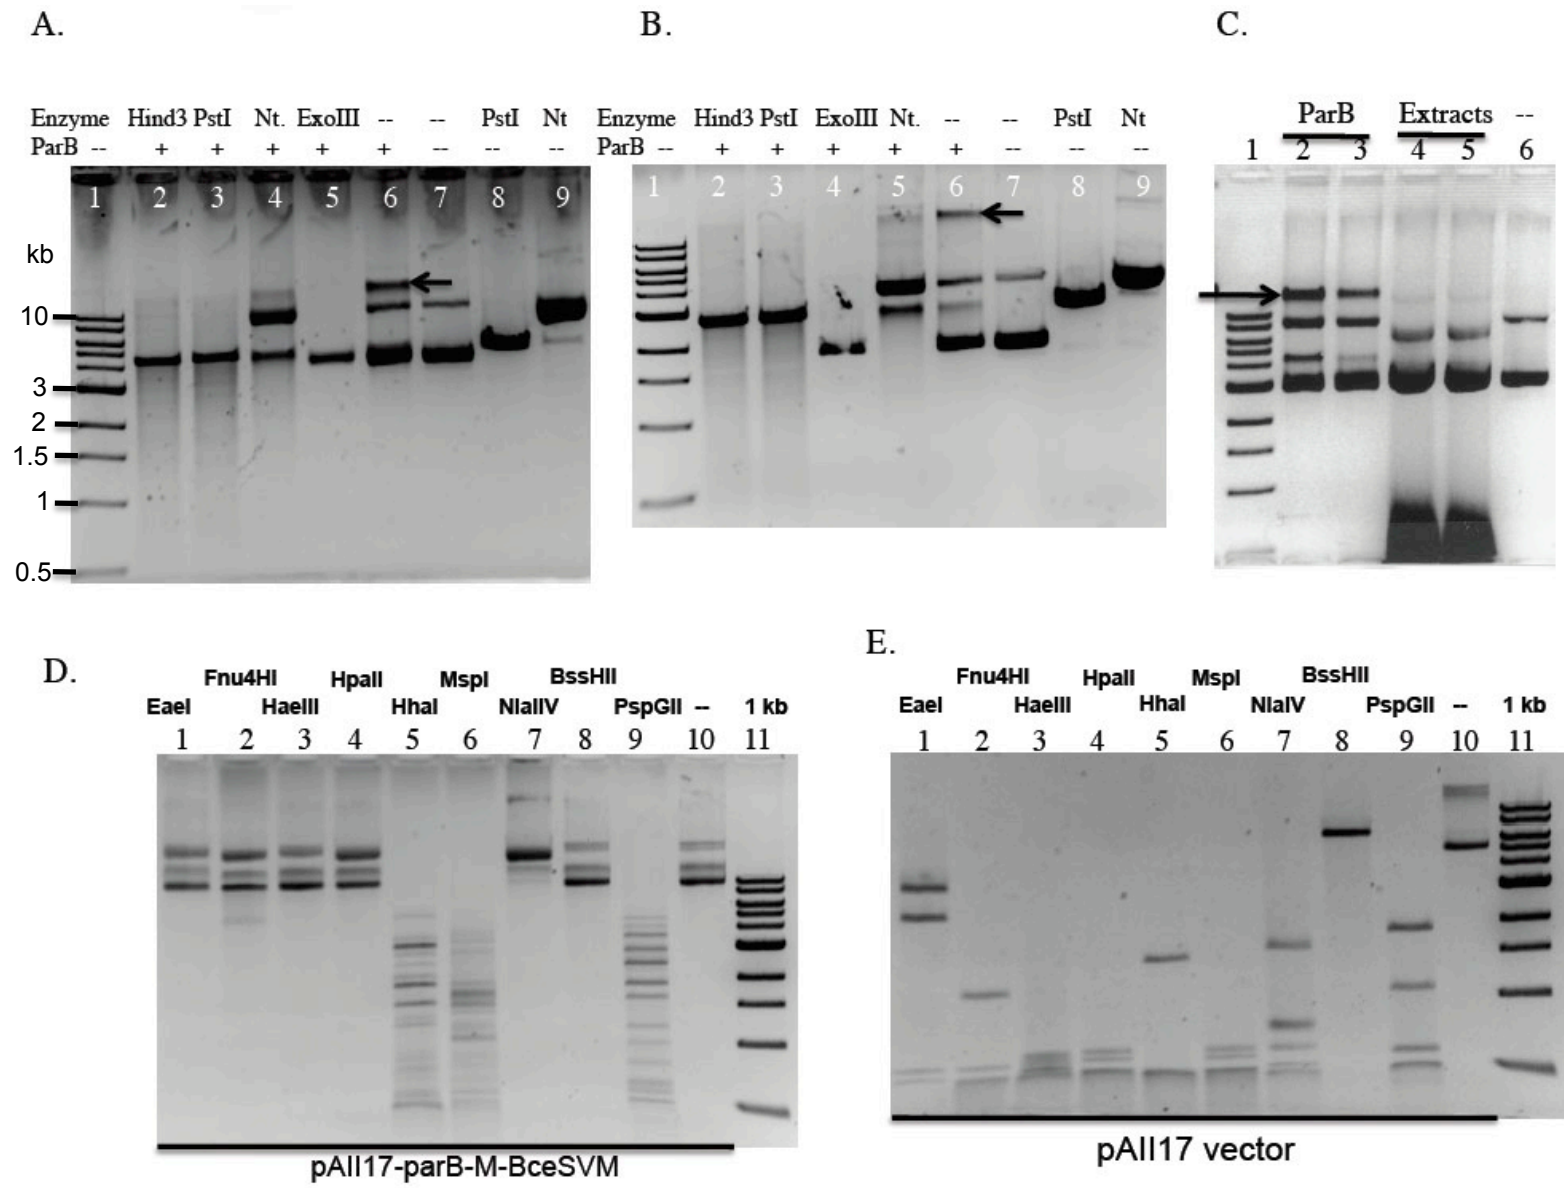

Supplementary Figure S7

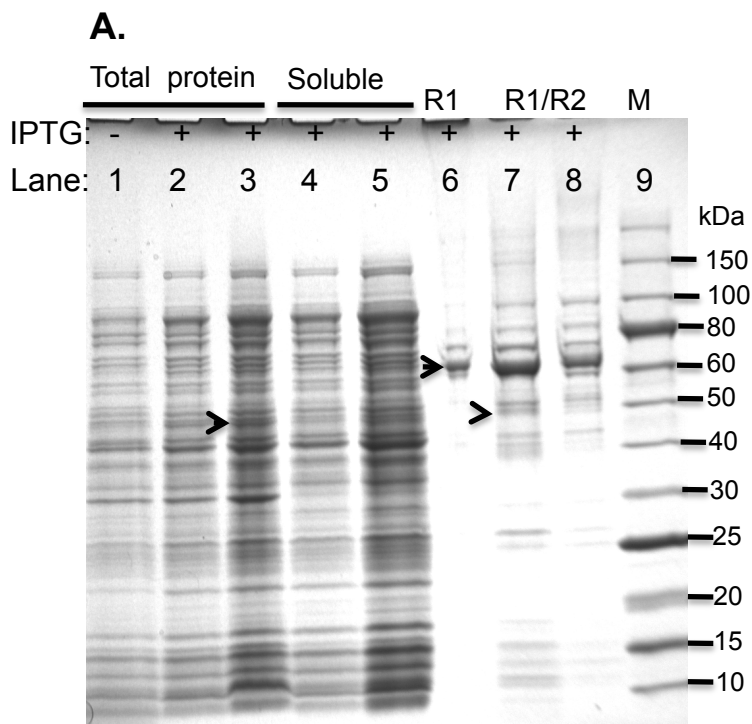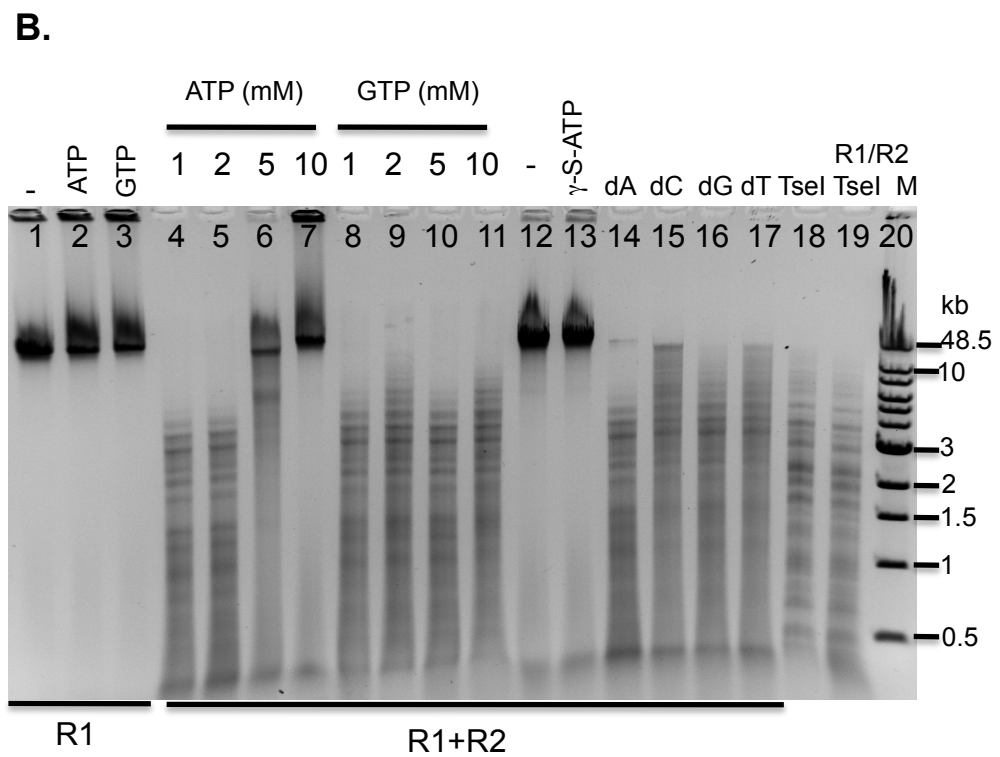

Supplement: supp_194.1.49_FigS1-S7.pdf [file supp_194.1.49_FigS1-S7.pdf]
